# Supplementary material for: Elevated Bile Acid 3β,5α,6β-Trihydroxycholanoyl Glycine in a Subset of Adult Ataxias Including Niemann–Pick Type C
Source: MDPI journal article supplement (doi:10.3390/antiox13050561), 2024-05-02
Supplement: s1 [file s1]

Supplementary materials

**Table S1. Complete list of numbers allocated to the 184 participants in the study with plasma concentrations in nmol/L of 3 $\beta$ ,5 $\alpha$ ,6 $\beta$ -trihydroxycholanoyl glycine (3 $\beta$ ,5 $\alpha$ ,6 $\beta$  -triOH-gly) and 3 $\beta$ ,7 $\beta$ -trihydroxy-5-cholenoyl glycine (3 $\beta$ ,7 $\beta$ -diOH- $\Delta$ 5-gly).**

**\*Plasma sample 20 is the one from the individual with NPC.**

| Plasma ID<br>number | 3 $\beta$ ,7 $\beta$ -<br>diOH-<br>$\Delta$ 5-Gly | 3 $\beta$ ,5 $\alpha$ ,6 $\beta$ -<br>triOH-<br>Gly | ID | 3 $\beta$ ,7 $\beta$ -<br>diOH-<br>$\Delta$ 5-Gly | 3 $\beta$ ,5 $\alpha$ ,6 $\beta$ -<br>triOH-<br>Gly | ID  | 3 $\beta$ ,7 $\beta$ -<br>diOH-<br>$\Delta$ 5-Gly | 3 $\beta$ ,5 $\alpha$ ,6 $\beta$ -<br>triOH-<br>Gly | ID  | 3 $\beta$ ,7 $\beta$ -<br>diOH-<br>$\Delta$ 5-Gly | 3 $\beta$ ,5 $\alpha$ ,6 $\beta$ -<br>triOH-<br>Gly | ID  | 3 $\beta$ ,7 $\beta$ -<br>diOH-<br>$\Delta$ 5-Gly | 3 $\beta$ ,5 $\alpha$ ,6 $\beta$ -<br>triOH-<br>Gly |
|---------------------|---------------------------------------------------|-----------------------------------------------------|----|---------------------------------------------------|-----------------------------------------------------|-----|---------------------------------------------------|-----------------------------------------------------|-----|---------------------------------------------------|-----------------------------------------------------|-----|---------------------------------------------------|-----------------------------------------------------|
| 1                   | 10.7                                              | 8.4                                                 | 41 | 108.1                                             | 9.6                                                 | 83  | 136                                               | 29.3                                                | 129 | 100.4                                             | 21.9                                                | 172 | 87.8                                              | 37.5                                                |
| 2                   | 79.4                                              | 8.9                                                 | 42 | 35.6                                              | 14.2                                                | 85  | 60.6                                              | 27.2                                                | 130 | 61.6                                              | 18.3                                                | 173 | 133.6                                             | 36.2                                                |
| 3                   | 236.9                                             | 15.7                                                | 43 | 162.5                                             | 10.8                                                | 86  | 45.9                                              | 57.8                                                | 131 | 284.1                                             | 38.7                                                | 174 | 172.5                                             | 32.9                                                |
| 4                   | 185.3                                             | 38.6                                                | 44 | 61.9                                              | 44.9                                                | 87  | 84.3                                              | 69.6                                                | 132 | 109.6                                             | 28.1                                                | 175 | 400.6                                             | 101                                                 |
| 5                   | 10.1                                              | 7.4                                                 | 46 | 116.2                                             | 41.2                                                | 88  | 58.5                                              | 111.5                                               | 134 | 26.3                                              | 28.4                                                | 176 | 41.9                                              | 60.1                                                |
| 6                   | 117.9                                             | 6.9                                                 | 47 | 31                                                | 14.1                                                | 89  | 127.1                                             | 21                                                  | 135 | 18.5                                              | 20.2                                                | 177 | 110.7                                             | 35.7                                                |
| 7                   | 120.8                                             | 20                                                  | 48 | 36.1                                              | 10.2                                                | 90  | 35.5                                              | 22.6                                                | 136 | 250                                               | 34.9                                                | 178 | 26.5                                              | 29.9                                                |
| 8                   | 114                                               | 7.2                                                 | 49 | 112.1                                             | 22.7                                                | 91  | 82                                                | 36.5                                                | 137 | 46.2                                              | 22                                                  | 179 | 272.4                                             | 42.2                                                |
| 9                   | 45.4                                              | 14                                                  | 50 | 37.1                                              | 14.4                                                | 92  | 44.2                                              | 63.2                                                | 138 | 19.6                                              | 19.7                                                | 181 | 499.7                                             | 30.7                                                |
| 10                  | 188.9                                             | 36.7                                                | 51 | 450                                               | 108.8                                               | 93  | 47.5                                              | 21.3                                                | 139 | 39.4                                              | 24.4                                                | 182 | 95.8                                              | 29.9                                                |
| 11                  | 75.5                                              | 12.8                                                | 52 | 42.4                                              | 85.2                                                | 94  | 67.1                                              | 28.9                                                | 140 | 38.4                                              | 33.3                                                | 183 | 174.1                                             | 35.7                                                |
| 12                  | 11.8                                              | 10.8                                                | 53 | 75.8                                              | 36                                                  | 95  | 277.4                                             | 18.3                                                | 141 | 21.1                                              | 19.7                                                | 184 | 115.7                                             | 44.4                                                |
| 13                  | 60.9                                              | 59                                                  | 54 | 71.2                                              | 10.9                                                | 96  | 74.7                                              | 22.4                                                | 142 | 179.5                                             | 18.5                                                | 185 | 964.5                                             | 99.7                                                |
| 14                  | 119.9                                             | 16.9                                                | 55 | 131.4                                             | 10.8                                                | 97  | 39.6                                              | 21.7                                                | 143 | 480.1                                             | 11.6                                                | 186 | 48.1                                              | 50.1                                                |
| 15                  | 64.4                                              | 12.4                                                | 56 | 92.4                                              | 10.8                                                | 98  | 93.2                                              | 23.6                                                | 144 | 4.4                                               | 10.3                                                | 187 | 35.1                                              | 28.2                                                |
| 16                  | 26.4                                              | 8.9                                                 | 57 | 386.4                                             | 15.6                                                | 100 | 82.6                                              | 165.3                                               | 145 | 161.1                                             | 12.2                                                | 188 | 697                                               | 50.1                                                |
| 17                  | 81.7                                              | 11.4                                                | 58 | 108.7                                             | 13.1                                                | 103 | 32.3                                              | 12.3                                                | 146 | 15.2                                              | 20.5                                                | 189 | 97.9                                              | 75.9                                                |
| 18                  | 216.6                                             | 45.4                                                | 60 | 58.8                                              | 16.4                                                | 104 | 45.2                                              | 12.2                                                | 148 | 91.6                                              | 20.2                                                | 190 | 136.3                                             | 33.9                                                |
| 19                  | 95.2                                              | 13.9                                                | 61 | 44.2                                              | 13.5                                                | 105 | 93.6                                              | 15                                                  | 149 | 9.8                                               | 66.3                                                | 191 | 289.4                                             | 67.1                                                |
| 20*                 | 78.4                                              | 123.9                                               | 62 | 32.4                                              | 45.9                                                | 106 | 85.8                                              | 35                                                  | 150 | 50.7                                              | 7.9                                                 | 192 | 150.3                                             | 38                                                  |

|    |       |      |    |       |      |     |       |      |     |       |       |     |       |      |
|----|-------|------|----|-------|------|-----|-------|------|-----|-------|-------|-----|-------|------|
| 21 | 278.5 | 15.7 | 63 | 63    | 15.9 | 107 | 135   | 19.1 | 151 | 92.7  | 15.6  | 193 | 142   | 37   |
| 22 | 130.4 | 11.5 | 64 | 19    | 17.8 | 108 | 34.1  | 18.3 | 152 | 41.4  | 6.7   | 194 | 108.9 | 27.9 |
| 23 | 40.7  | 6.7  | 65 | 78.7  | 17.7 | 110 | 249.7 | 41.1 | 153 | 22.3  | 11.6  | 196 | 150.2 | 43.2 |
| 24 | 46.8  | 24   | 66 | 27.6  | 12.8 | 111 | 24.7  | 17.6 | 154 | 126.6 | 219.2 | 197 | 14    | 15.5 |
| 25 | 168.3 | 8.9  | 67 | 24.9  | 38.7 | 112 | 417.4 | 26.3 | 155 | 104.9 | 159.4 |     |       |      |
| 26 | 23    | 7.9  | 68 | 82.7  | 17.3 | 113 | 21    | 12.6 | 156 | 97.8  | 43.1  |     |       |      |
| 27 | 5.7   | 11   | 69 | 24.1  | 9.5  | 114 | 278   | 36.3 | 158 | 141.4 | 14.7  |     |       |      |
| 28 | 70.9  | 12   | 70 | 65    | 34.6 | 115 | 113.6 | 36.7 | 159 | 10    | 4.8   |     |       |      |
| 29 | 10.2  | 6.4  | 71 | 110.2 | 12.6 | 116 | 51.7  | 47.6 | 160 | 265.3 | 48.3  |     |       |      |
| 30 | 375.7 | 14.6 | 72 | 127.5 | 26.3 | 117 | 14    | 14.1 | 161 | 33.9  | 14.5  |     |       |      |
| 31 | 93.9  | 27.8 | 73 | 30.6  | 23.3 | 118 | 88.9  | 21.9 | 162 | 108.8 | 2.3   |     |       |      |
| 32 | 61.4  | 28.8 | 74 | 43    | 22.1 | 119 | 76.3  | 24.2 | 163 | 89.4  | 12.9  |     |       |      |
| 33 | 24.5  | 8.3  | 75 | 280.5 | 42.2 | 120 | 141.3 | 36.2 | 164 | 51.9  | 11.5  |     |       |      |
| 34 | 51.2  | 9.1  | 76 | 38.7  | 23   | 121 | 131.6 | 26.5 | 165 | 183.6 | 17.6  |     |       |      |
| 35 | 19.3  | 6.4  | 77 | 109.9 | 20.9 | 122 | 13.3  | 17.3 | 166 | 25.3  | 31.2  |     |       |      |
| 36 | 260.9 | 31.1 | 78 | 217.6 | 24.3 | 123 | 144.1 | 38.8 | 167 | 122   | 31.2  |     |       |      |
| 37 | 63.8  | 6.1  | 79 | 114.2 | 20.8 | 124 | 32.9  | 32.7 | 168 | 104.4 | 33.6  |     |       |      |
| 38 | 302.7 | 52.2 | 80 | 21.3  | 19.2 | 125 | 147.7 | 28.6 | 169 | 334   | 52.5  |     |       |      |
| 39 | 91.9  | 11.1 | 81 | 217.6 | 34.8 | 126 | 94.2  | 29.6 | 170 | 187.6 | 36.7  |     |       |      |
| 40 | 109.5 | 54.2 | 82 | 66.9  | 22.4 | 127 | 204.1 | 32.1 | 171 | 31.6  | 72.7  |     |       |      |

| Table S2: The features of patients with an identified genetic diagnosis in our study |        |            |                 |                                |                |                                                                                                                                                                      |                                            |                                             |
|--------------------------------------------------------------------------------------|--------|------------|-----------------|--------------------------------|----------------|----------------------------------------------------------------------------------------------------------------------------------------------------------------------|--------------------------------------------|---------------------------------------------|
| Plasma Sample ID                                                                     | Sex    | Birth year | Age at sampling | Genetic Diagnosis              | Gene           | Comment                                                                                                                                                              | 3 $\beta$ ,7 $\beta$ -diOH- $\Delta$ 5-Gly | 3 $\beta$ ,5 $\alpha$ ,6 $\beta$ -triOH-Gly |
| 1                                                                                    | Male   | 1957       | 59              | HSP                            | SPG7           | Homozygous for the c.1529C>T p.(Ala510Val) pathogenic variant                                                                                                        | 10.7                                       | 8.4                                         |
| 2                                                                                    | Male   | 1959       | 57              | HSP                            | SPG7           | Compound heterozygous for c.1454_1462del p.(Arg485_Glu487del) & c.1672A>T p.(Lys558*)                                                                                | 79.4                                       | 8.9                                         |
| 18                                                                                   | Male   | 1966       | 50              | SCA13                          | KCNC3          | Heterozygous for the c.1259G>A p.(Arg420His) pathogenic variant                                                                                                      | 216.6                                      | 45.4                                        |
| 20                                                                                   | Male   | 1996       | 20              | NPC/primary ciliary dyskinesia | NPC1 & CCDC114 | Homozygous for the c.3493G>A p.(Val1165Met) likely pathogenic variant in NPC1 and homozygous for the c.287del p.(Lys96Argfs*23) likely pathogenic variant in CCDC114 | 78.4                                       | 123.9*                                      |
| 33                                                                                   | Male   | 1964       | 52              | HSP                            | SPG7           | Compound heterozygous for c.1529C>T p.(Ala510Val) & c.1672A>T p.(Lys558*)                                                                                            | 24.5                                       | 8.3                                         |
| 47                                                                                   | Male   | 1955       | 61              | SCA11                          | TTBK2          | Heterozygous for the c.1297_1304del p.(Pro433Argfs*15) likely pathogenic variant                                                                                     | 31                                         | 14.1                                        |
| 69                                                                                   | Female | 1984       | 32              | EA1                            | CACNA1A        | Heterozygous for the c.2042_2043delAG p.(Gln681Argfs*100)                                                                                                            | 24.1                                       | 9.5                                         |
| 75                                                                                   | Female | 1983       | 34              | AOA2                           | SETX           | Homozygous presence of c.4161_4162insTT; p. Val1388LeufsTer27                                                                                                        | 280.5                                      | 42.2                                        |
| 78                                                                                   | Female | 1959       | 57              | SCA10                          | ANO10          | Homozygous for the c.132dup p.(Asp45Argfs) pathogenic variant                                                                                                        | 217.6                                      | 24.3                                        |

|     |        |      |    |                                                                         |         |                                                                                                                         |               |               |
|-----|--------|------|----|-------------------------------------------------------------------------|---------|-------------------------------------------------------------------------------------------------------------------------|---------------|---------------|
| 81  | Female | 1945 | 71 | Autosomal dominant or recessive spinocerebellar ataxia (ADSCA/ARSCA)    | ANO10   | Homozygous for the c.132dup p.(Asp45fs) pathogenic frameshift mutation                                                  | 217.6         | 34.8          |
| 100 | Male   | 1961 | 56 | EA                                                                      | CACNA1A | Heterozygous for the c.2636_2652dup p.(Ala885Thrfs*14) likely pathogenic mutation                                       | 82.6          | <b>165.3*</b> |
| 108 | Female | 1940 | 77 | CANVAS                                                                  | RFC1    | Homozygote for two pathogenic AAGGG repeat expansions of >150 repeats.                                                  | 34.1          | 18.3          |
| 112 | Female | 1950 | 66 | CANVAS                                                                  | RFC1    | Homozygote for two pathogenic RFC1 AAGGG repeat expansions of >150 repeats.                                             | <b>417.4*</b> | 26.3          |
| 119 | Male   | 1986 | 31 | SCA28                                                                   | AFG3L2  | Heterozygous for c.2069G>T p.(Ser690Ile) variant                                                                        | 76.3          | 24.2          |
| 135 | Male   | 1955 | 62 | Leigh Syndrome                                                          | MT-ATP6 | Homoplasmic for the m.9176T>C p.(Leu217Pro) pathogenic variant                                                          | 18.5          | 20.2          |
| 141 | Male   | 1997 | 21 | CACNA1A-related ataxia                                                  | CACNA1A | Heterozygous variant for the c.4988G>A; p.Arg1663Gln                                                                    | 21.1          | 19.7          |
| 142 | Female | 1988 | 28 | SCA26                                                                   | XRCC1   | Homozygous for the c.1293C G p.(Lys43 Asn) likely pathogenic variant                                                    | 179.5         | 18.5          |
| 148 | Male   | 1990 | 27 | X-linked recessive Charcot-Marie-Tooth disease-4                        | AIFM1   | Hemizygous for the c.784G>A p.(Gly262Ser) likely pathogenic variant<br>c.784G>A p.(Gly262Ser) likely pathogenic variant | 91.6          | 20.2          |
| 155 | Female | 1970 | 46 | FA                                                                      | FXN     | compound heterozygote for two FXN GAA repeat expansions in the pathogenic range.                                        | 104.9         | <b>159.4*</b> |
| 156 | Male   | 1978 | 40 | Familial Hemiplegic Migraine type 1, with progressive cerebellar ataxia | CACNA1A | Heterozygous pathogenic mutation c.4999C>T p.(Arg1667Trp)                                                               | 97.8          | 43.1          |

|     |        |      |    |                                                          |         |                                                                                                                                           |       |      |
|-----|--------|------|----|----------------------------------------------------------|---------|-------------------------------------------------------------------------------------------------------------------------------------------|-------|------|
| 163 | Female | 1955 | 63 | Occult Macular Dystrophy                                 | RP1L1   | Heterozygous for the c.4294_4295insGGCCAGGAGGAGGAAG p.(Ala1432Glyfs*29) likely pathogenic variant                                         | 89.4  | 12.9 |
| 166 | Male   | 1980 | 36 | Suggestive (not confirming) of SCA8                      | SYNE1   | Heterozygous for two variants : the likely pathogenic c.15898C>T p.(Arg5300*) and the c.24099+8C>G p.? variant of uncertain significance. | 25.3  | 31.2 |
| 172 | Female | 1981 | 37 | Mast syndrome                                            | SPG21   | Homozygous for the c.152_153del p.(Pro51Argfs*38) likely pathogenic variant                                                               | 87.8  | 37.5 |
| 176 | Male   | 1954 | 64 | EA                                                       | CACNA1A | Heterozygous variant for the c.4005delA p.(Gly1336Glu fs*36)                                                                              | 41.9  | 60.1 |
| 183 | Male   | 1970 | 48 | SCA3                                                     | ATXN3   | Heterozygous for one allele with CAG in the expanded pathogenic range                                                                     | 174.1 | 35.7 |
| 184 | Female | 1956 | 60 | Leigh Syndrome (mitochondrial respiratory chain disease) | MT-ATP  | Homoplasmic m.8851T>C p.(Trp109Arg) pathogenic variant                                                                                    | 115.7 | 44.4 |
| 191 | Female | 1965 | 51 | SCA14                                                    | PRKCG   | Heterozygous for the c.413T>A p.(Val138Glu) likely pathogenic variant                                                                     | 289.4 | 67.1 |
| 193 | Male   | 1975 | 41 | Recessive SCA8                                           | SYNE1   | Heterozygous for the c.14077C>T p.(Arg4693*) and c.14287C>T p.(Arg4763*) likely pathogenic variants                                       | 142   | 37   |

**\*Values considered elevated**

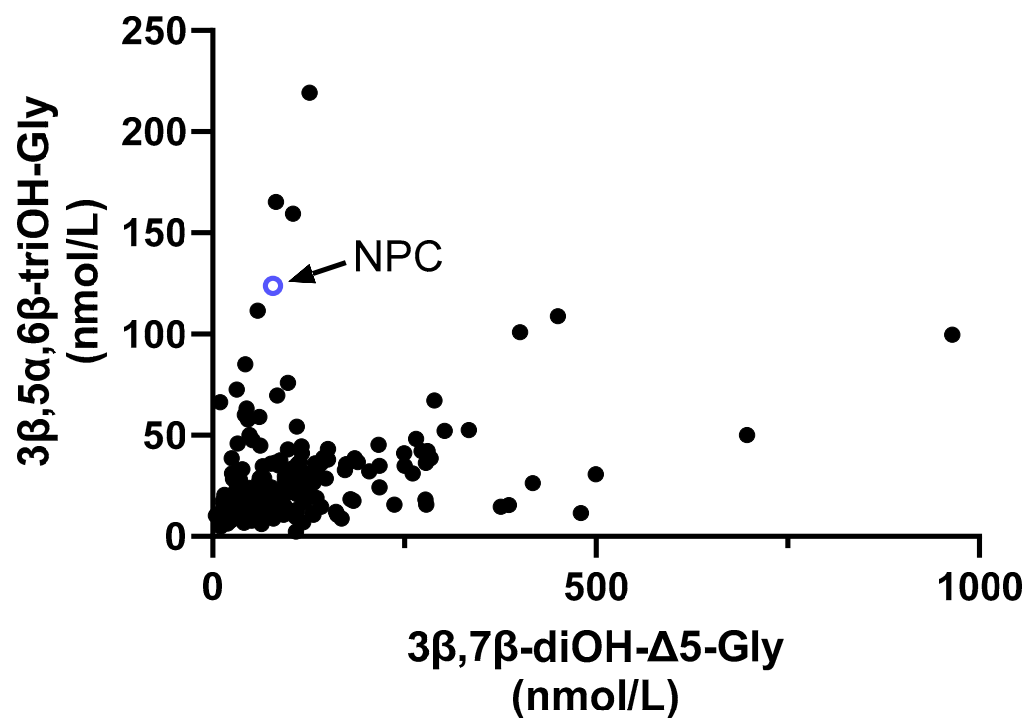

**Figure S1:** Scatter plot illustrating the relationship between bile acids 3β,5α,6β-triOH-Gly and 3β,7β-diOH-Δ5-Gly, in our study. Each data point on the plot corresponds to a specific patient, with NPC patient being highlighted with an arrow. This patient had 3β,5α,6β-triOH-Gly of 123.9 nmol/L and 3β,7β-diOH-Δ5-Gly of 78.4 nmol/L.

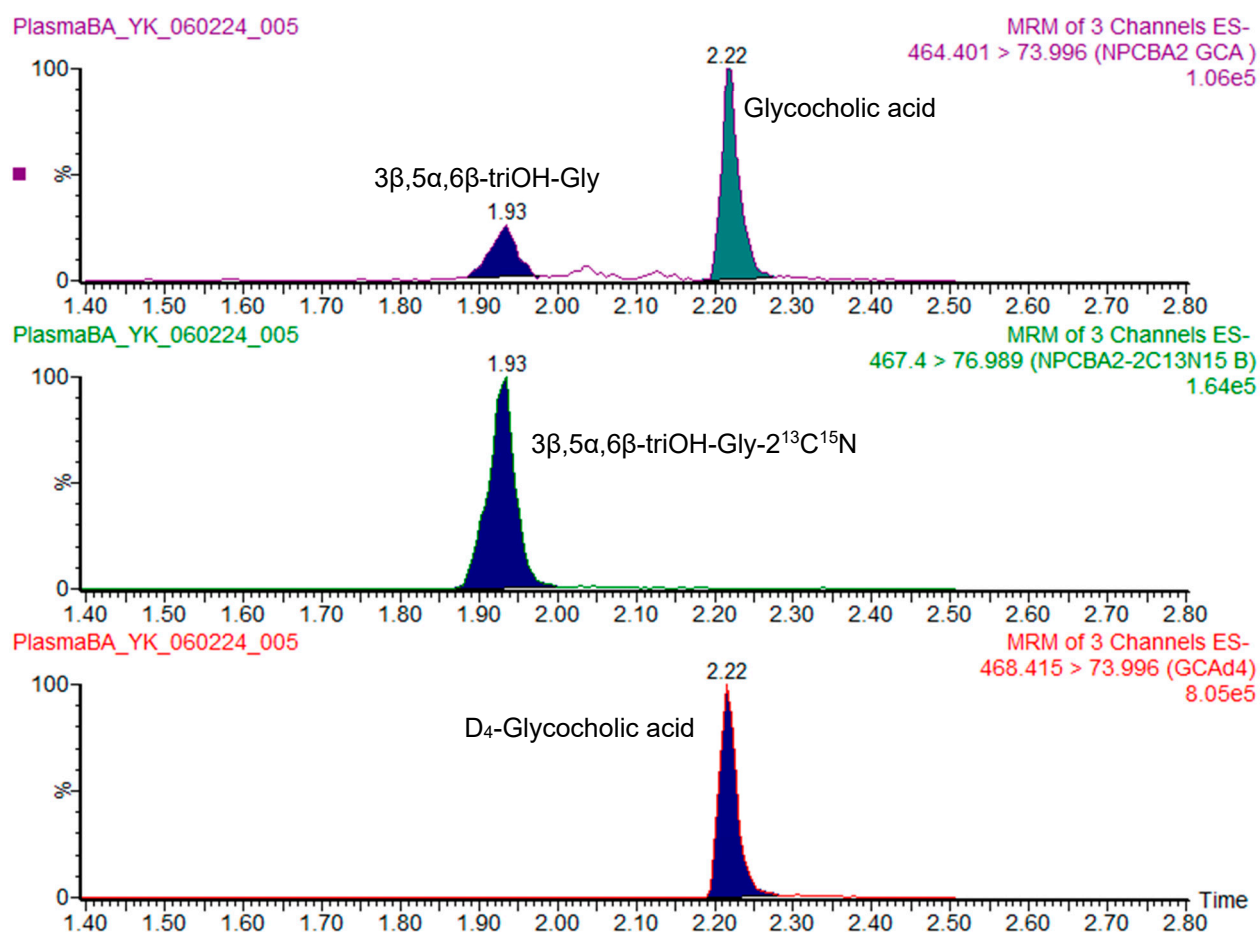

**Figure S2:** Chromatograms of 3β,5α,6β-trihydroxycholestanoyl-glycine and glycocholic acid in plasma from an NPC patient. Identification of 3β,5α,6β-triOH-Gly is confirmed based on its retention time and fragment ion (m/z 464>74).

**NPCBA2 daughter 32V**

ATAXIA060224\_001 2 (0.335) Cn (Cen,4, 80.00, Ar); Sm (SG, 3x0.50)

Daughters of 464ES-  
2.37e6

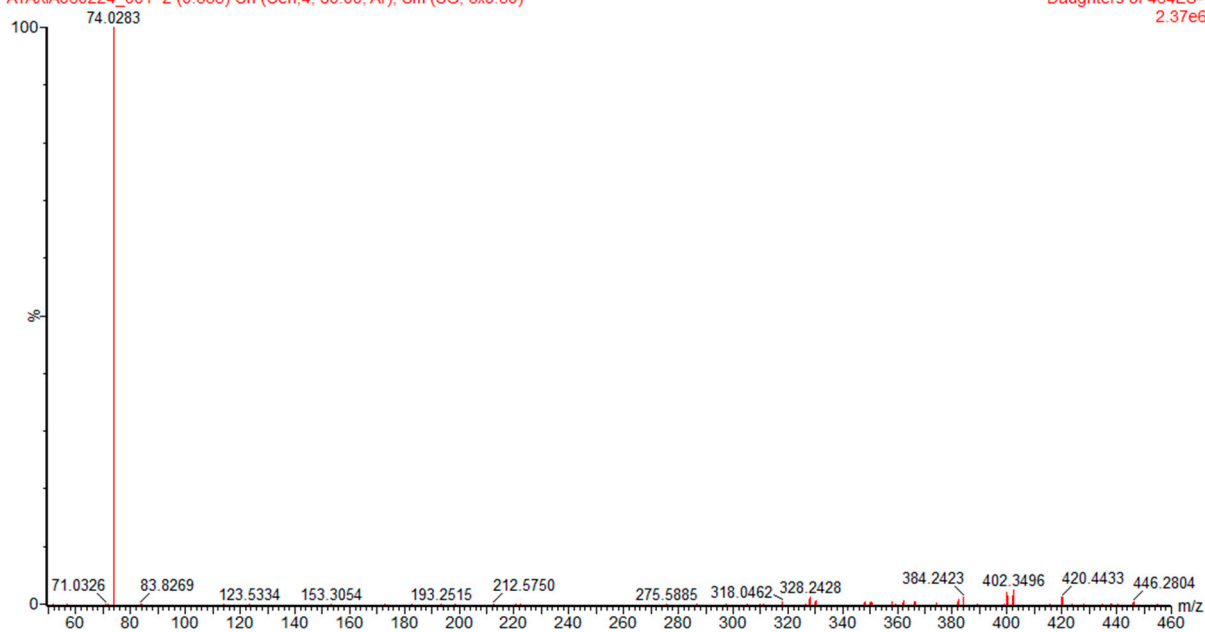

**Figure S3:** Fragment ions from m/z 464 corresponding to 3 $\beta$ ,5 $\alpha$ ,6 $\beta$ -trihydroxycholanoyl-glycine.
